# Supplementary material for: An ultrafast thermal-responsive, shape memory and solvent-driven Fe3+-alginate/poly(N-isopropyl acrylamide)-based hydrogel actuator
Source: Royal Society of Chemistry journal article supplement (doi:10.1039/d4py01047g), 2025-01-01
Supplement: d4py01047g4.pdf [file d4py01047g4.pdf]

## Support Information

### **Ultrafast thermal responsive, shape memory and solvent-driven Fe<sup>3+</sup>-alginate/poly (N-isopropyl acrylamide) based hydrogel actuator**

Hongcai Wang<sup>a,b,c</sup>, Xiuqiong Chen<sup>a,b,c</sup>, Yanan Bu<sup>b,c</sup>, Ting Wu<sup>a,b,c</sup>, Huiqiong Yan<sup>a,b,c\*</sup>, Qiang Lin<sup>a,b,c</sup>

<sup>a</sup> Key Laboratory of Tropical Medicinal Resource Chemistry of Ministry of Education, College of Chemistry and Chemical Engineering, Hainan Normal University, Haikou 571158, Hainan, P. R. China.

<sup>b</sup> Key Laboratory of Water Pollution Treatment & Resource Reuse of Hainan province, College of chemistry and chemical engineering, Hainan Normal University, Haikou 571158, Hainan, P. R. China.

<sup>c</sup> Key Laboratory of Natural Polymer Functional Material of Haikou City, College of chemistry and chemical engineering, Hainan Normal University, Haikou 571158, Hainan, P. R. China.

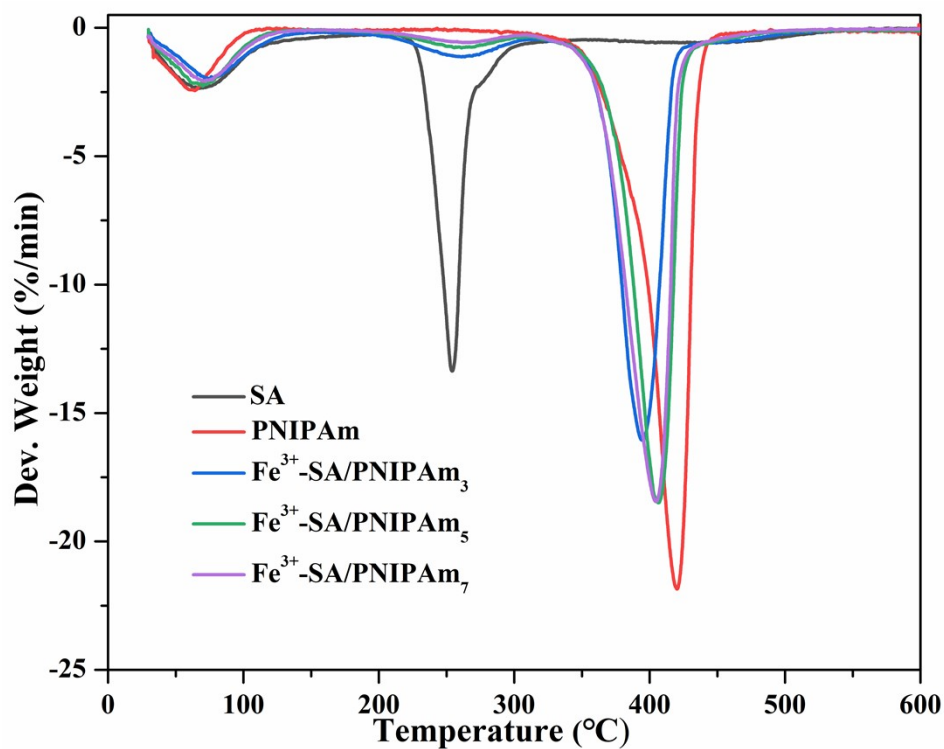

Figure S1. DTG curves of SA, PNIPAm and Fe<sup>3+</sup>-SA/PNIPAm hydrogels.

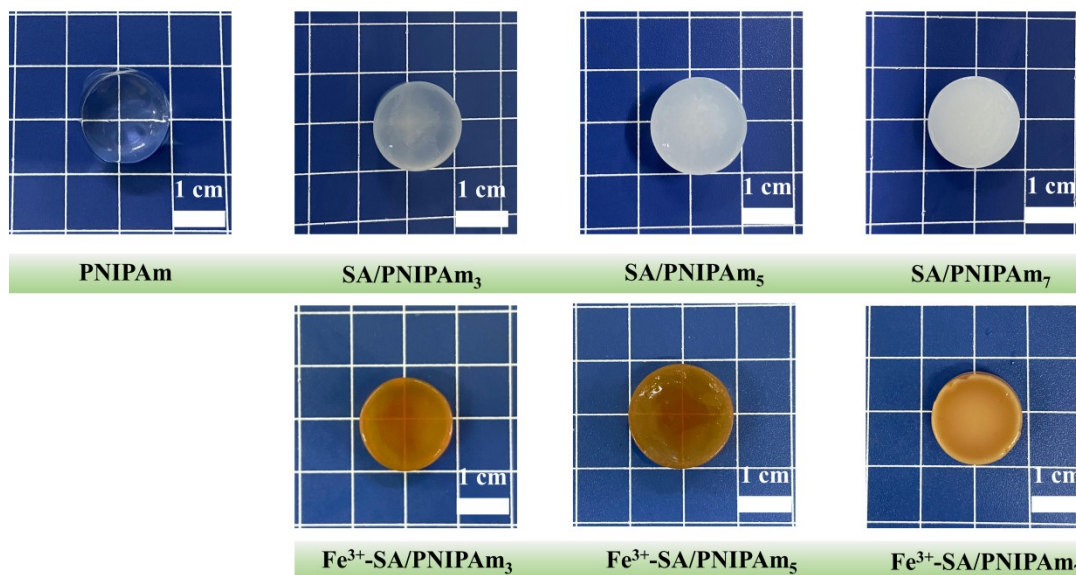

Figure S2. Optical images of PNIPAm, SA/PNIPAm<sub>3</sub>, SA/PNIPAm<sub>5</sub>, SA/PNIPAm<sub>7</sub>, Fe<sup>3+</sup>-SA/PNIPAm<sub>3</sub>, Fe<sup>3+</sup>-SA/PNIPAm<sub>5</sub> and Fe<sup>3+</sup>-SA/PNIPAm<sub>7</sub> hydrogels.

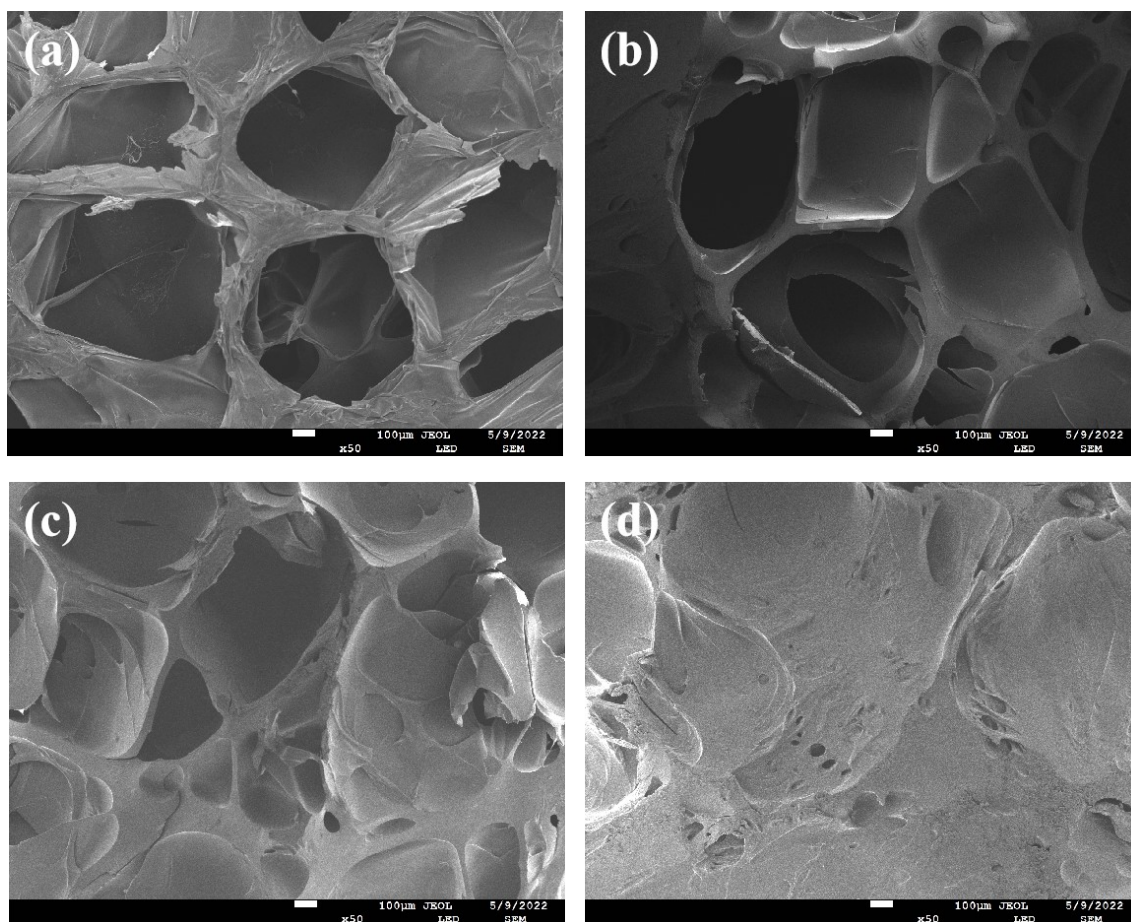

Figure S3. SEM images of (a) PNIPAm, (b) Fe<sup>3+</sup>-SA/PNIPAm<sub>3</sub>, (c) Fe<sup>3+</sup>-SA/PNIPAm<sub>5</sub> and (d) Fe<sup>3+</sup>-SA/PNIPAm<sub>7</sub> hydrogels.
